# Supplementary material for: The Deubiquitinating Enzyme Inhibitor PR-619 Enhances the Cytotoxicity of Cisplatin via the Suppression of Anti-Apoptotic Bcl-2 Protein: In Vitro and In Vivo Study
Source: PubMed Central journal article supplement (PMC6830310; doi:10.3390/cells8101268), 2019-10-17
Supplement: cells-08-01268-s001.pdf [file cells-08-01268-s001.pdf]

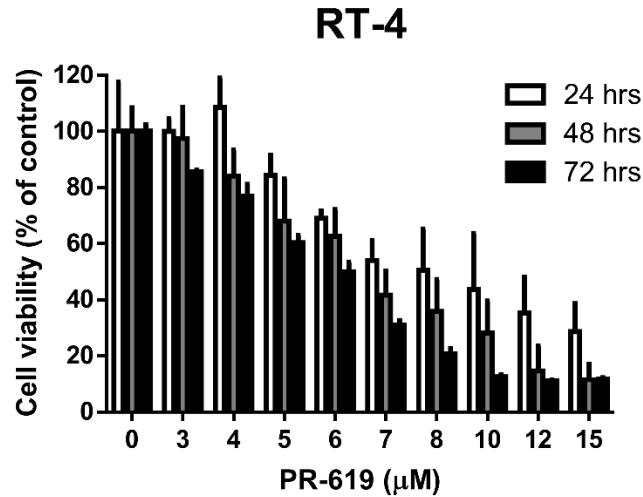

**Figure S1.** PR-619 induced cytotoxicity in low-grade UC RT-4 cells in a dose-dependent and time-dependent manner. RT-4 cells were treated with various concentrations of PR-619 (3–15 μM) for 24 h, 48 h, and 72 h, respectively. Cell viability was assessed using the MTT assay.

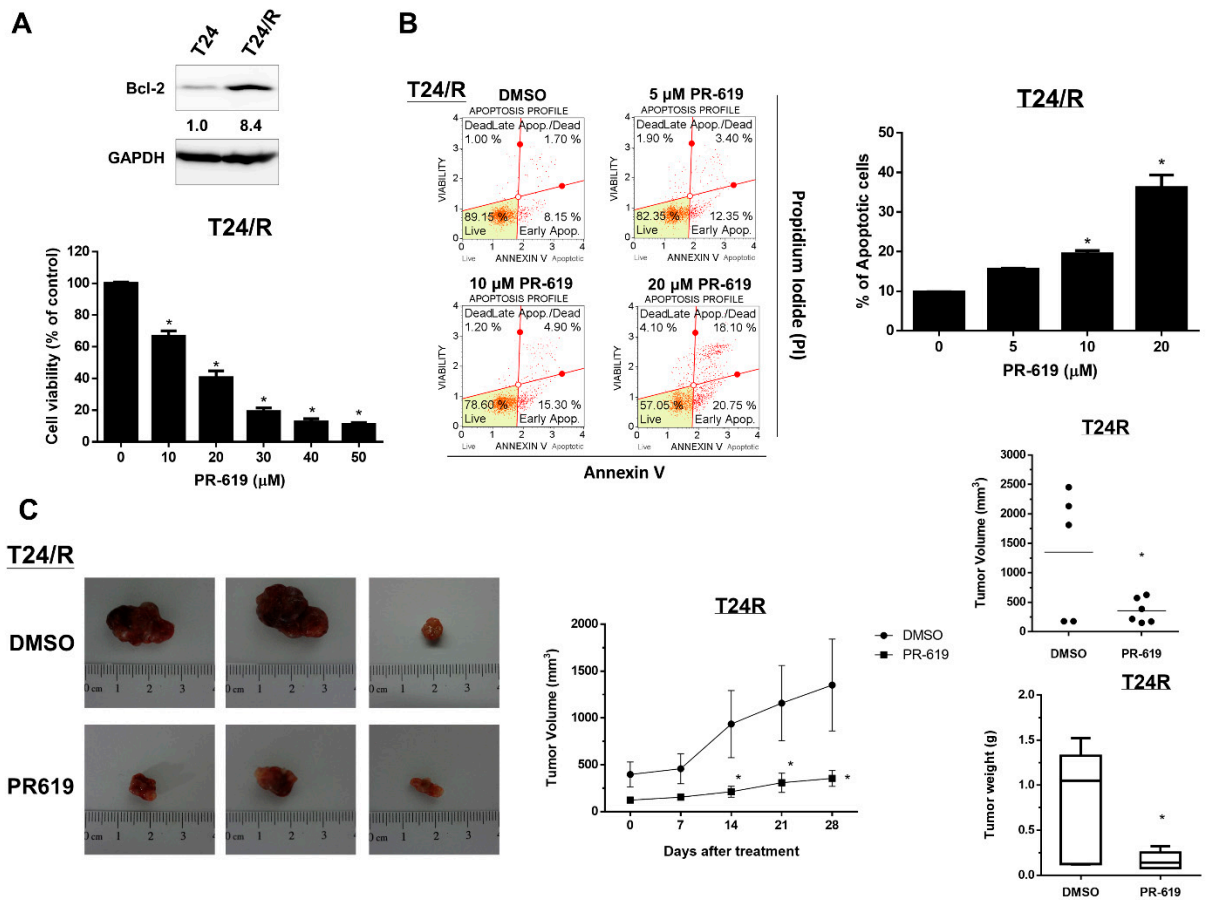

**Figure S2.** PR-619 effectively inhibited the cell viability and tumor growth of cisplatin-resistant UC (T24/R) *in vitro* and *in vivo*. (A) T24/R cells were treated

with various concentrations of PR-619 (10–50  $\mu\text{M}$ ) for 24 h. Cell viability was assessed using the MTT assay. (B) T24/R cells were treated with various concentrations of PR-619 (5, 10, and 15  $\mu\text{M}$ ) and DMSO for 24 h. Apoptotic cells were analyzed through FACS flow cytometry with propidium iodide and annexin V-FITC staining. The quantitative analyses of apoptosis are presented as the means  $\pm$  SD.; \* $p < 0.05$  compared with the control. (C) Nude mice bearing a cisplatin-resistant T24/R tumor xenograft over the bilateral flank area were treated with DMSO in normal saline (control,  $n=5$ ) or PR-619 (10 mg/kg/day, i.p. ( $n=5$ )) for 4 weeks. Tumor images represent excised tumors from two groups. Weekly tumor volume for each group during the 4-week treatment. The tumor volume and weight in both groups after 4-week treatment are demonstrated. The data are presented as means  $\pm$  standard error of the mean.

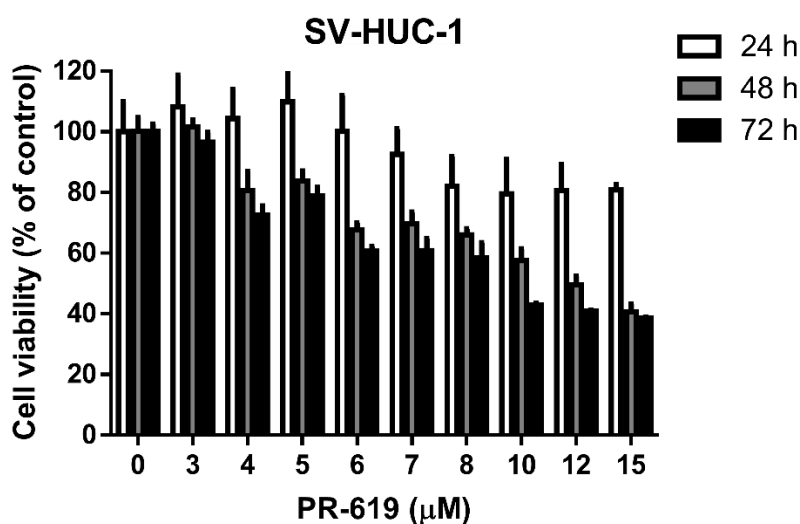

**Figure S3.** PR-619 elicited selective cytotoxic effects on UC cells compared to those on simian virus 40-transformed and immortalized human urothelial (SV-HUC-1) cells. SV-HUC-1 cells were treated with various concentrations of PR-619 (3–15  $\mu\text{M}$ ) for 24 h, 48 h and 72 h, respectively. Cell viability was assessed using the MTT assay.

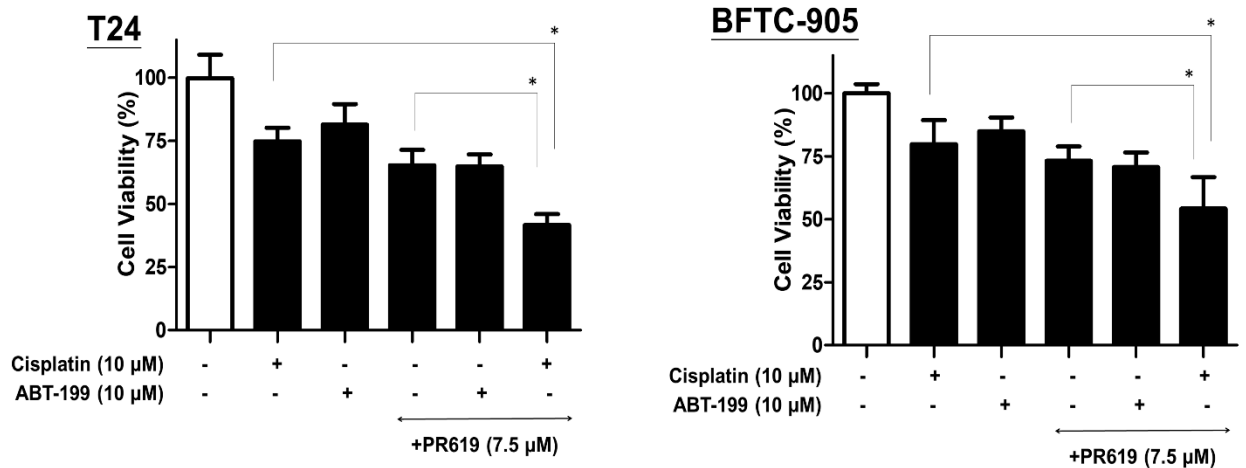

**Figure S4.** ABT-199, a Bcl-2 inhibitor elucidated limited impact on the cytotoxicity of PR-619. T24 and BFTC-905 cells were treated with various concentrations of ABT-199 (10 μM), cisplatin (10 μM), PR-619 (7.5 μM), alone or in combination for 24 h. Cell viability was assessed using MTT assay. Data were presented as the means ± SD. All results shown are representative of at least three independent experiments

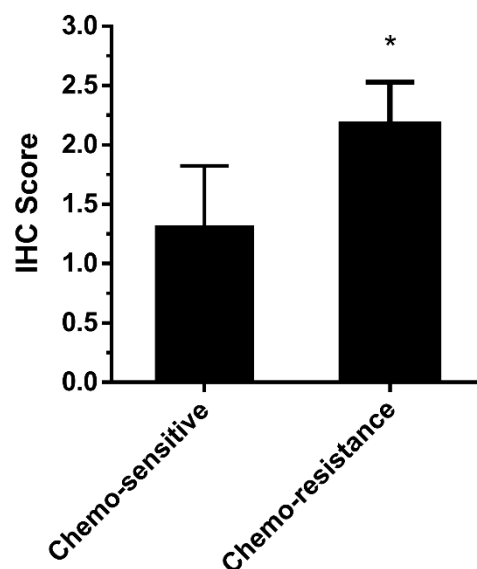

**Figure S5.** IHC score for measuring the immunoreactivity of Bcl-2 in bladder UC tissue samples from patients with metastatic UC with a chemo-resistant versus chemo-sensitive status. The method used to estimate the IHC score was described in the Materials and Methods section.
